# Supplementary material
Source: HighWire-hosted journal article supplement (http://rc.rcjournal.com/highwire/filestream/11932/field_highwire_adjunct_files/1/2540suppl2.pdf)
Supplement: 2540suppl2.pdf [file 2540suppl2.pdf]

**Supplementary Table 1: Main characteristics of tested ventilators**

| Tested ventilator                                                                             | Software version | Control principle                                                                                                                   | Neonatal and or pediatric modes                                                                                                          | Flow sensor                                         | Triggering and cycling parameters                                                                                                                                                             | Leak compensation                                                                                                                                                                                                                                                                                                                                                                        | Leaks unit  |
|-----------------------------------------------------------------------------------------------|------------------|-------------------------------------------------------------------------------------------------------------------------------------|------------------------------------------------------------------------------------------------------------------------------------------|-----------------------------------------------------|-----------------------------------------------------------------------------------------------------------------------------------------------------------------------------------------------|------------------------------------------------------------------------------------------------------------------------------------------------------------------------------------------------------------------------------------------------------------------------------------------------------------------------------------------------------------------------------------------|-------------|
| SLE®5000 (SLE Ltd, South Croydon, UK)<br><br>http://www.sle.co.uk                             | 4.3              | Continuous flow (8L/min)                                                                                                            | 0.350-20Kg<br>Delivering volumes from 2 to 200ml                                                                                         | Proximal dual-hotwire 10 mm anemometer flow sensor  | Inspiratory flow trigger: 0,2 à 2 L/min<br><br>Cycling: 0-50%; default value 5%                                                                                                               | Leak compensation included in the latest versions 4000 and 5000<br>In the presence of a leak the ventilator automatically increases the termination sensitivity to just above the measured leak and thereby allows inspiration to be cycled off.<br>The leak compensation is effective from 10% - 50%.                                                                                   | %           |
| Leoni®Plus (Heinen & Loöwenstein, Bad Ems, Germany)<br><br>www.hul.de                         | 2.2.12           | Continuous flow, flow-cycled, pressure-limited                                                                                      | From premature infants to 30 Kg<br>Delivering volumes from 2 to 200ml                                                                    | Proximal flow sensor; 10 mm dual-hotwire Anemometer | Inspiratory flow trigger: (0,1 à 1 lpm)<br>Cycling: fixed value 25% of peak inspiratory flow                                                                                                  | Leak compensation : automatic adjustment of difference between VTI and VTE                                                                                                                                                                                                                                                                                                               | %           |
| Fabian® ( Acutronic Medical Systems AG, Hirzel – Switzerland)<br><br>www.acutronic-medical.ch | 1.0.0.30         | Continuous flow, flow-cycled, pressure-limited                                                                                      | Neonatal and pediatric modes Identical, except for the inspiratory flow limitation : neonatal = 1 - 20 L/min and paediatric 1 - 32 L/min | Proximal hot wire flow sensor                       | Inspiratory Trigger: (Scales 1 to 20)<br>- Volume trigger with sensitivity of 5 to 20 % of inspiratory volume<br>- Flow trigger with 5 to 20% of<br><br>Cycling: 10-70% Peak inspiratory flow | Flow always available and the exhalation valve just maintains a constant pressure<br>To compensate the trigger level, the continuous flow through ET tube is taken as offset for the trigger level.                                                                                                                                                                                      | %           |
| Babylog®VN500 Plus or VN®500 (Dräger, Lübeck, Germany)<br><br>www.draeger.com                 | 1.21             | Demand flow system with a base flow of:<br>- 6l/min in neo.mode<br>- 3l/min in ped.mode                                             | Neonatal mode: 400g - 10kg<br><br>Pediatric mode: 5kg - 20kg                                                                             | Proximal flow sensor hot wire anemometer            | Inspiratory flow trigger: 0.2 to 5 L/min<br>Cycling: fixed value 15% of peak flow.                                                                                                            | Calculation of a leak index: measurements of the leak flow by subtracting expiratory to inspiratory flow and determination of the leak index as a function of airway pressure. Compensation by an increased inspiratory flow.<br>Only the patient flow is used for the flow trigger or the inspiratory termination criterion.<br>The adaptation to the level of leaks takes few breaths. | % and L/Min |
| Evita option NeoFlow (Dräger Inc., Lübeck, Germany)<br><br>www.draeger.com                    | 7.0              | Pediatric: Demand flow system<br><br>Neonatal: Demand flow system with base flow of 6l/min (can be adjusted by biomed up to 9l/min) | Neomode: 0.5-6Kg<br><br>Pediemode : 3-15Kg                                                                                               | Proximal flow sensor hot wire anemometer            | Flow trigger 0.3 to 5l/min<br>Cycling: 5-70% of the Peak inspiratory flow for pediatric mode; 15% in neomode.                                                                                 | Evita XL takes into account both the flow signal from the neonatal flow sensor (Flowinsp) and the calculated leakage minute volume (MVleak).<br>The leakage flow is converted to the momentary pressure level (PAW): FlowPatient, insp = Flowinsp – MVleak x PAW / Pmean.<br>The automatic compensation of leaks allows for direct adjustment of tidal volume down to 3 mL.              | %<br>L/min  |
| Engstrom Carestation (GE Healthcare, Madison, USA)<br><br>www.gehealthcare.com                | 6.0              | Variable flow combined to continuous flow                                                                                           | Pediatric mode from 0.250 Kg to 7Kg                                                                                                      | Proximal dual hotwire Anemometer flow sensor        | Inspiratory flow trigger: 0.2-9L/min;<br>Pressure flow trigger -10 to 0.25 cm H2O<br>Cycling: 5-80% of the peak inspiratory flow. Default value: 25%                                          | Instantaneous leak flow calculation:<br>- Vleak = Volume leakage during the last 30s<br>- Leakage: Vleak x (Instantaneous pressure / mean pressure during the last 30sec)<br>Flow patient: measured flow-leak flow<br>Patient flow is compensated according to the leakage.<br>Compensation up to 50L/min                                                                                | %           |

|                                                                                     |     |               |                                                                                                |                                                                                                          |                                                                                                                                                                                                                                                     |                                                                                                                                                                                                                                                                                                                                                                                                                                                                                                    |                  |
|-------------------------------------------------------------------------------------|-----|---------------|------------------------------------------------------------------------------------------------|----------------------------------------------------------------------------------------------------------|-----------------------------------------------------------------------------------------------------------------------------------------------------------------------------------------------------------------------------------------------------|----------------------------------------------------------------------------------------------------------------------------------------------------------------------------------------------------------------------------------------------------------------------------------------------------------------------------------------------------------------------------------------------------------------------------------------------------------------------------------------------------|------------------|
| <p>AVEA® Comprehensive (CareFusion, Yorba Linda, USA)</p> <p>www.carefusion.com</p> | 4.4 | Variable flow | Neonatal mode 0.1-16Kg                                                                         | Proximal hotwire flow sensor (a two stage variable orifice flow sensor is available too, for single use) | <p>Inspiratory flow trigger 0.1-20L/min</p> <p>Peak inspiratory flow 0.4-30L/min.</p> <p>Bias flow 2-5L/min</p> <p>Pressure Support: 0-80 cm H2O</p> <p>PEEP:0-50 cm H2O</p> <p>Cycling: 5-45 % of peak inspiratory.</p> <p>Default value = 10%</p> | <p>No specific NIV algorithm but leak compensation, designed to compensate for loss of pressure, but not for inspiratory or expiratory triggers.</p> <p>To compensate the leaks, the ventilator maintains the set pressure by increasing the inspiratory flow if necessary.</p>                                                                                                                                                                                                                    | %                |
| <p>G5, (Hamilton, Bonaduz, Switzerland)</p> <p>www.hamilton-medical.ch</p>          | 2.0 | Variable flow | Pediatric mode from 3 to 42Kg                                                                  | Proximal pressure differential flow sensor;                                                              | <p>Inspiratory flow trigger: 0.1-15L/min.</p> <p>Pressure trigger:0-10 cm H<sub>2</sub>O</p> <p>Cycling: 1-70 % of the peak inspiratory flow. Default value 15%</p>                                                                                 | <p>Leak compensation already included in the PS mode; increase of the flow in order to compensate for the loss of the flow due to the leak.</p>                                                                                                                                                                                                                                                                                                                                                    | % ml/cycle L/min |
| <p>PB840 (Covidien, Mansfield, MA, USA)</p> <p>www.covidien.com</p>                 | AH  | Variable flow | <p>Neonatal mode, from 300g to 7Kg; pediatric mode 3.5-35 Kg</p> <p>VTs delivered from 2ml</p> | Distal flow sensors, two inspiratory and one expiratory. All are hot film anemometer                     | <p>Inspiratory flow trigger 0.1-10 L/min neonatal; pediatric 0.2-20L/min</p> <p>Bias flow = Flow trigger + 1.5 L/min</p> <p>Cycling: 1-80% of the peak inspiratory flow. Default value = 25%</p>                                                    | <p>The leak compensation option adds flow to the breathing circuit to compensate for leaks.</p> <p>When enabled, the leak compensation function compensated for circuit leaks during exhalation in order to maintain PEEP and avoid auto-triggering.</p> <p>No flow is added if no leak is present.</p> <p>Accuracy for VTE changes.</p> <p>Compensated up to 10L/min for neonates and 40L/min for pediatrics</p> <p>Leak at PEEP: exhalation leak—the leak rate during exhalation at PEEP</p>     | % L/min          |
| <p>SERVO-i® (Maquet Critical Care AB, Solna, Sweeden)</p> <p>www.maquet.com</p>     | 5.0 | Variable flow | Pediatric mode from 0.5 to 30 Kg (NIV 3-30 Kg)                                                 | Ultrasonic flow sensor, located in the ventilator                                                        | <p>Inspiratory flow trigger: 0 – 100 % (100% = 0,5 l/min); pressure trigger: - 20 to 0 cmH<sub>2</sub>O.</p> <p>Cycling: 1-70 %Peak inspiratory flow.</p> <p>Default value= 30%</p>                                                                 | <p>NIV algorithm: Measurement (sampling rate 2000Hz) and compensation of the leak by increasing the inspiratory flow to maintain, up to 25L/min.</p> <p>Sustainment of the end expiratory pressure (minimum level 1-2 cmH<sub>2</sub>O) during expiration and adjusted pressure during inspiration</p> <p>Inspiratory trigger becomes automatic: PEEP decrease of 1 cm H<sub>2</sub>O during expiration or expiratory flow decrease of 6 ml during 100 ms.(first come – first serve principle)</p> | %                |

In this table are presented the ten ventilators tested characteristics. Leaks in % are calculated as follows:  $VTI-VTE/VTI * 100$
